# Virtue as the mean: Pan-human consensus genome significantly improves the accuracy of RNA-seq analyses

Benjamin Kaminow<sup>1</sup>, Sara Ballouz<sup>1,2,3</sup>, Jesse Gillis<sup>1</sup>✉, Alexander Dobin<sup>1</sup>✉

✉Jesse Gillis: [jgillis@cshl.edu](mailto:jgillis@cshl.edu); Alexander Dobin: [dobin@cshl.edu](mailto:dobin@cshl.edu)

<sup>1</sup>Cold Spring Harbor Laboratory, Cold Spring Harbor, NY, USA; <sup>2</sup>Garvan-Weizmann Centre for Cellular Genomics, Garvan Institute of Medical Research, Darlinghurst, NSW; <sup>3</sup>School of Medical Sciences, University of New South Wales, Sydney, NSW

**The Human Reference Genome serves as the foundation for modern genomic analyses. However, in its present form, it does not adequately represent the vast genetic diversity of the human population. In this study, we explored the consensus genome as a potential successor of the current Reference genome, and assessed its effect on the accuracy of RNA-seq read alignment. In order to find the best haploid genome representation, we constructed consensus genomes at the Pan-human, Super-population and Population levels, utilizing variant information from the 1000 Genomes project. Using personal haploid genomes as the ground truth, we compared mapping errors for real RNA-seq reads aligned to the consensus genomes versus the Reference genome. For reads overlapping homozygous variants, we found that the mapping error decreased by a factor of ~2-3 when the Reference was replaced with the Pan-human consensus genome. Interestingly, we also found that using more population-specific consensus resulted in little to no increase over using the Pan-human consensus, suggesting a limit in the utility of incorporating more specific genomic variation. To assess the functional impact, we performed transcript expression quantification and found that the Pan-human consensus increases accuracy of transcript quantification for hundreds of transcripts.**

## Background

In 2003, 15 years of work culminated with the International Human Genome Sequencing Consortium publishing the first finished version of the Human Reference Genome [21,22]. Despite the utility and continuous improvements over the years, it is still not without flaws – primarily the lack of variation information. Around 93% of the current GRCh38 assembly is composed of DNA from just 11 individuals [17, 26]. Because such a large portion of the Reference comes from such a small pool of individuals, it does not adequately represent the vast diversity present in the human population [9,32,34]. To explore and capture human diversity, researchers have continued sequencing thousands of genomes. The first of such projects, the 1000 Genomes Project, sequenced 2,504 individuals across 26 populations. Overall, it was estimated that ~3,000 genomes would be necessary to capture the most common variants [23], while structural variation present in the human populations has challenged this [6]. One particularly glaring example was shown in a recent construction of an African pan-genome, which contained almost 300M bases of DNA not seen in GRCh38 [34]. This lack of variation information negatively affects all kinds of genomic analyses that utilize the Reference, such as disease studies and GWAS analyses [7-9,32,34,38]. However, despite the ubiquity of RNA-seq alignment and quantification, the improvements on mapping from using a more diverse reference have not been shown.

While graph genomes are theoretically capable of encapsulating all observed variation information [11,18,29,31,37,41], it remains difficult to use these tools for large scale expression analysis such as in RNA-seq quantification. In prior work, we proposed the use of a consensus genome to inherently capture common variation, whilst still retaining the structure and functionality of the current Reference assembly [4]. A consensus genome is a linear haploid genome that incorporates population variation information by replacing all minor alleles in the Reference genome with the major allele of that variant [3,4,5,13,25,36,30] (Figure 1a). Because allele frequencies must be defined with respect to a population, a consensus genome is representative of the population used to define the major and minor alleles. Prior work has shown that using a consensus genome can have positive effects on variant calling, [25,30,36] and construction of population-specific consensus genomes has been a major goal of multiple projects [10, 15,19, 34,39]. Additionally, replacing the current Reference genome with a consensus genome in existing analysis pipelines is straightforward, since the consensus genome is still a linear haploid sequence.

Here, we seek to answer the question of which linear reference representation is best for RNA-seq mapping and transcript expression estimation. We considered several consensus genomes, built by replacing all minor alleles in the reference with the major alleles at different population levels: pan-human, super-population, and population. To work with consensus genomes, we developed ConsDB to construct pan-human and

population-level consensus, and STAR-consensus to streamline RNA-seq mapping to consensus genomes. We defined the ground truth by mapping the individuals' RNA-seq reads to their own personal haploid genomes, and evaluated the mapping accuracy improvements arising from replacing the GRCh38 reference with the Pan-human consensus, Super-population or Population consensus genomes. We found that for all individuals, the Pan-human consensus decreased the mapping error from the Reference by ~2-3 fold, while the Super-population and Population consensus did not perform significantly better than the Pan-human consensus. To assess the functional impact, we measured errors in transcript expression quantification for different genome representations with respect to the ground truth of the personal genome. We again found that the Pan-human consensus offers an improvement over the Reference, with almost 6 times as many transcripts having a larger transcript quantification error for the Reference than for the Pan-human consensus.

## Pan-human Consensus captures the majority of population deviation from the Reference

The construction of consensus genomes requires population allele frequency information. Currently, several databases exist that contain this information [2,12,24,35]. In this study we utilized the 1000 Genomes Project database, which was established in order to discover and catalogue human genome variant information [2,12]. In order to avoid population bias, the individuals genotyped in the 1000 Genomes Project were selected to create an even population distribution across 26 populations, which are grouped into 5 super-populations [2] (Figure 1b). The information from the 1000 Genomes Project is available through the International Genome Sample Resource (IGSR), and can be downloaded in the form of VCF files, which contain variant genotype information for all of the individuals contained in the analysis [2].

We constructed three types of consensus genomes based on the various population levels present in the 1000 Genomes Project: a Pan-human consensus genome, a Super-population consensus genome, and a Population consensus genome (Figure 1b). For the Pan-human consensus we calculated allele frequency using genotype information from all individuals present in the database. For the Super-population and Population consensus, we used genotype information from all individuals of a given super-population or population. For the 8 individuals whose RNA-seq data we utilized in this study, we used the consensus genomes built from the super-population and population to which each individual belongs. To construct these consensus, we replaced all minor alleles (alleles with a

population allele frequency  $AF < 0.5$ ) present in the Reference with the major alleles ( $AF > 0.5$ ). We will call these variants replaced in the reference the major allele replacements (MAR). The release of the 1000 Genomes database that we used contained only biallelic variants, i.e. each variant had exactly one minor allele and one major allele. Additionally, it only contained SNPs and small insertions and deletions ( $< 50$  bp), while large structural variants were not considered in this study. Although SVs are a large source of genomic variation, they are understudied and not sufficiently catalogued to be used in consensus genomes due to mapping and classification difficulties [28].

In order to facilitate working with the large VCF files of the 1000 Genomes Project database, we developed ConsDB, a Python package that provides a convenient, class-based interface to work with the large number of variants contained in the 1000 Genomes Project database. It also provides a main script with a number of run modes to perform common tasks associated with consensus genomes, such as the construction of the consensus genome VCF files used in this study. ConsDB operates using a simple workflow (Figure 1c). The first step is downloading the database VCF files. For this study, we used the 1000 Genomes Project, but ConsDB is also capable of parsing gnomAD VCF files. The next step is for ConsDB to parse the database VCF files and save them in the ConsDB format. At this point, files from different databases (if multiple databases are being used) can be combined into one file per chromosome. Finally, ConsDB uses these parsed files to generate the end result, in this case a VCF file defining a consensus genome.

The personal haploid genomes were constructed using the individual genotypes from the 1000 Genomes Project database. For each individual, all homozygous variants that differ from the Reference were inserted into the Reference. Additionally, all heterozygous alleles were randomly chosen with a probability of 0.5 to be included or excluded. Although these haploid personal genomes are a crude approximation of the true diploid genome, they are sufficient for comparison of mapping accuracy between haploid consensus and the haploid Reference, and thus we used them to define the ground truth for RNA-seq mapping in this study.

Figure 1d shows the number of minor alleles in the GRCh38 reference that have to be replaced with the major alleles for each of the Super-population consensus genomes. The European consensus is the most similar to the Reference, and it still requires ~2.1 million SNP and indel corrections from the Reference. Other Super-population consensus contain even larger numbers of major allele deviations from the Reference, with the East Asian consensus differing most from the Reference. We note that such a large number of minor alleles in

the Reference with respect to any population stems from its construction, which utilized sequences from only one individual for most of the genomic loci, and thus incorporated individual-specific low frequency alleles.

In Figure 1e, we compute intersections of the MARs in the Pan-human, African Super-population, and Yoruban Population consensus genomes. The Pan-human consensus shares most of the major alleles with the Super- and Population consensus (~1.5M), while the latter two share ~400k MARs not present in the Pan-human consensus. The Pan-human consensus contains ~300k MARs not present in either Super- or Population consensus. Finally, the Yoruban Population consensus contains ~50k unique MARs. The intersections of MARs look similar for other populations (Supplementary Figures S1-2) as well as personal homozygous variants (Supplementary Figures S3-5). Figure 1f shows the intersections between the MARs for the Pan-human consensus and 3 Super-population consensus. The MARs shared by all four of these genomes make up the largest group, which contains ~1.2M MARs and represents well over half of the MARs in any one genome. This group is more than 3 times as large as the next largest group, again demonstrating that the majority of the population deviation from the Reference is captured in the Pan-human consensus.

## Consensus genomes significantly improve RNA-seq mapping

Next, we analyzed to what extent the consensus genomes improve RNA-seq mapping accuracy. The RNA-seq reads were taken from the Human Genome Structural Variation Consortium, which sequenced three father-mother-daughter trios from the 1000 Genomes Project [40]. One of these individuals (HG00514 from the East Asian trio) is not present in the database version used in this analysis, and was excluded from our analysis.

To simplify alignment to the consensus genome, we developed STAR-consensus, an extension to the RNA-seq aligner STAR (Figure 2a) [14]. It imports variants from a VCF file and incorporates them into the reference genome sequence, thus creating a transformed genome for mapping. Importantly, after mapping the reads to the transformed genome, STAR-consensus can perform a reverse transformation of the alignment coordinates back to the original reference genome coordinates. This transformation is non-trivial when insertion or deletion variants are included, and allows performing all downstream analyses in the reference coordinate system. Such an approach is an incremental but important step towards taking advantage of the consensus genome, while at the same time utilizing the conventional coordinate system.

In order to assess error rate, we needed to compare the read mappings in the various genomes to a ground truth. However, because the true mapping location of these reads is unknown, we used the read mappings to the personal haploid genomes as the ground truth. The personal haploid genomes are a close approximation of the true genomes, and therefore the locations to which the reads map in the personal genomes should be quite similar to their true original locations.

We classified mapping errors into five types of errors based on the change of the read's alignment status in the Reference/consensus genome compared to the ground truth (Figure 2b). The different error types are: reads that are mapped uniquely in the personal genome but mapped to multiple places in the other genome (Unique to Multiple), reads that are mapped to multiple places in the personal genome but mapped uniquely in the other genome (Multiple to Unique), reads that mapped to the personal genome but not to the other genome (Mapped to Unmapped), reads that didn't map to the personal genome but did map to the other genome (Unmapped to Mapped), and reads that mapped uniquely in both genomes but to different positions (Different Mapping Loci). The mapping error rate for an error type is defined as the number of erroneously mapped reads normalized by the total number of reads from an individual.

For each individual, we calculated the error rates for mapping to the Reference and their respective consensus genomes (Pan-human, Super-population, Population). Figure 2c shows the overall error rates for each error type for the individual NA19238. The largest error comes from the reads that switch from mapping uniquely in the personal genome to mapping to multiple loci in the Reference/consensus genomes, followed by reads that map to multiple loci in the personal genome but map uniquely in the Reference/consensus.

We also separately plotted the error rate for reads that overlap indel variants (Supplementary Figure S6), which are very small compared to the overall error rates in Figure 2c. These plots look similar for the other individuals (Supplementary Figures S7-20).

Figure 2d shows the overall mapping error rate for all eight individuals, summed over the five error types. We see a noticeable decrease in the error rate when the Reference genome is replaced with the Pan-human consensus. Notably, increasing population specificity to the Super-population or Population consensus does not result in a significant further reduction of the error rate. This trend mirrors the observation about the minor alleles discussed above (Figure 1e-f), and supports the conjecture that the majority of the mapping accuracy improvement is captured by the Pan-human consensus, with little additional benefit from the Super-population or Population consensus.

Replacement of the minor alleles in the Reference with the major alleles in the consensus can only correct the mapping errors caused by the homozygous alternative alleles in an individual. Of course, the actual individual genome is diploid and contains millions of heterozygous variants (i.e. both the major and minor alleles are present), which cannot be truthfully represented in a haploid Reference or consensus genome. To elucidate this issue, we defined the homozygous mapping error rate as the number of erroneously mapped reads that overlap homozygous variants normalized by the total number of reads overlapping homozygous variants for an individual. The homozygous mapping error rate shows the effect of different genomes specifically on read alignments that can be affected by these genomes. Because the genomes used in this study are all haploid, we do not expect reads that overlap heterozygous variants to be significantly affected by the specific genome used.

We plotted the homozygous mapping error rates for the individual NA19238 (for each error type) in Figure 2e, and for all eight individuals (summed over all error types) in Figure 2f. Compared to Figure 2c-d, the homozygous error rates (Figures 2e-f) show a much steeper decrease when the Reference genome is replaced with the Pan-human consensus. Additionally, the heterozygous error rate is higher than the homozygous error rate and stays relatively constant across all genomes (Supplementary Figures S21-28). This supports the notion that consensus genomes significantly improve mapping accuracy of the reads that overlap homozygous variants, however, owing to their haploid nature, they cannot improve the alignment of the reads overlapping heterozygous loci.

## Mapping RNA-seq reads to unrelated consensus genomes outperforms the Reference

We next investigated the effects of mapping an individual's RNA-seq reads to consensus genomes of different populations (Figure 3a) and to other personal haploid genomes (Figure 3c). We used the same reads, individuals, and genomes as previously discussed, and mapped all individuals to all genomes. The homozygous mapping error rate is calculated as before, and is shown in Figures 3b,d.

As expected, Figure 3b shows that the unrelated consensus genomes perform worse than both related Population consensus and the Pan-human consensus, because each Population consensus contains many major alleles unique to that population. Interestingly, unrelated consensus genomes still perform better than the Reference. This is explained by the fact that the Reference contains a large number of minor alleles specific to the individuals who contributed to the Reference

assembly. Conversely, the personal genomes of unrelated individuals are unlikely to share many MARs. This is illustrated in Figure 3d: the mapping error rate to personal genomes from different populations is higher than mapping to the Pan-human consensus and is comparable with mapping to the Reference. Notably, even mapping to the unrelated individual from the same population (Mother to Father and Father to Mother) does not improve the accuracy significantly. However, since the daughter in each trio will share many of her MARs with her parents, we see the error rates for mapping daughters' RNA-seq reads to their parents' genome (and vice versa) slightly better than mapping to the Pan-human consensus.

The results demonstrate that the Reference genome performs worse than any consensus genome, even consensus from a different population. The accuracy of mapping to the Reference is comparable to mapping to unrelated personal genomes. On the other hand, the Pan-human consensus outperforms mapping to the unrelated individual genomes of the same or different population, and its performance is comparable with mapping to the genomes of related individuals (parent to child).

## Mapping error-causing variants are predominantly located in introns and UTRs

To investigate the genomic mechanisms underlying these mapping errors, we classified the genomic loci of the error-causing variants by overlapping error-causing reads with the GENCODE v29 GTF file. Interestingly, only a small proportion of the error-causing variants occur in the coding regions, while most are located in the intronic regions, followed by UTR and intergenic regions (Figure 4a). Because polyA+ RNA-seq reads should generally not map to introns, these errors are likely attributable to reads switching between being uniquely mapped and mapping to multiple locations (Unique to Multiple and Multiple to Unique error types). Interestingly, this corresponds with the previous observation that the largest sources of errors were the Unique to Multiple and Multiple to Unique error types.

## Consensus alleles generate large changes in transcript expression

Here, we explore the effect of replacing the Reference with a consensus genome on the transcript expression. We used RSEM [27] to quantify transcript expression (TPM) for reads mapped to the Reference and to the Pan-human consensus, again using the haploid personal genome as the ground truth. In this analysis, we excluded insertions and deletions in order to avoid any discrepancies between the internal transformed genome generated by STAR and the genome used by RSEM to generate



its genomic indices. The quantification error is defined as the log2-ratio of the TPM in the Reference or Pan-human consensus to the TPM in the personal (ground truth) genome. Although the vast majority of transcripts show very similar expression results for both genomes, there are many transcripts with large quantification errors (Figures 4b-d). To reduce noise, we filtered the transcripts with low expression in all three genomes at three TPM thresholds of 0.2, 1 and 5 (Figure 4c-d). For all three thresholds, there were ~6 times as many transcripts for which the quantification error in the Reference was higher than that in the Pan-human consensus (Figure 4d).

To illustrate the effect of consensus genomes on the transcript quantification, we looked at a transcript of the *ALDH3A2* gene, which has zero expression in the personal genome and the Pan-human consensus genome (no error), but at the same time exhibits non-zero expression in the Reference (~2 TPM), which signifies a large error with respect to the ground truth. A genome browser snapshot of selected regions of this gene is shown in Figure 4e, highlighting the effects that MARs can have on read mapping and on transcript expression prediction. In this case, the Reference contains the minor allele, which causes reads to map to the short exon, and hence the isoform (ENST00000582991.5) containing this exon has non-zero expression. At the same time, both the Pan-human consensus and personal HG00512 genome contain the major allele, which prompts the read alignments to skip the short exon, resulting in zero expression for the ENST00000582991.5 isoform.

## Discussion

In any data analysis, often a first central question is how much variation to include. This might be accomplished by dimension reduction, quality control, feature selection, stratification, or other techniques. The human genome is no exception, and considering how best it should be summarized remains a crucial problem. Importantly, that problem may have a use-dependent solution. What is important for disease variant detection may not be important for RNA-seq alignment, and vice versa. The current Reference genome has had enormous utility, and before tearing down the infrastructure that has been built up to exploit it, it is important to consider alternatives carefully. Graph genome methods are one promising option, and they resolve the main deficiency in the reference: effectively incorporating all variation (or aspiring to). However, this comprehensiveness comes with its own host of issues, such as the lack of a simple coordinate system, difficulties with visualization, and significantly inflated computing requirements. The wide adoption of a graph-based reference genome will likely take a long time, given the history of switching from one version of the linear Reference to the next: GRCh38 was released in December 2013 [1], and at the time of this writing, 7 years later, studies are still being published using GRCh37.

Although the full adoption of a graph genome may be several years in the future, the path there need not be a straight line. We may explore methods that partially improve on the current Reference, while imposing few of the costs of the graph methods. By progressively assessing the role of population variation (in essence, moving from low principal components to higher ones), we can develop intermediate forms moving from the current reference to more accurate reflections of population variation and, particularly, ones that still opt to summarize variability to some degree. The consensus genomes have substantial utility at the pan-human level, and then show a fall off past that point, suggesting that the Pan-human consensus can be considered a first step in the direction of adding population variation information to the Reference. Although consensus genomes are unable to comprehensively represent all human genotypic variation, they are still a desirable alternative to the Reference as they eliminate the millions of spurious minor alleles present in the current Reference genome, while maintaining a simple linear coordinate system.

In this study, we explored the advantages and limitations of using consensus genomes for RNA-seq mapping. We used read alignments to the haploid personal genome as a proxy for the ground truth to quantify the rate of erroneous alignments to the Reference genome, and compared it to the three levels of consensus: pan-human, super-population and population.

The overall mapping error rate caused by Reference shortcomings is quite small at only ~0.5-0.6% of all reads for the Reference genome, and further reduced to 0.3-0.4% for the consensus genomes, leaving relatively small room for further improvements (Figure 2d). However, for some analyses, such as allele-specific expression or de novo variant calling, the only reads of interest are those that overlap the variants. If we normalize the number of the erroneous reads by the number of reads that overlap the personal variants for each individual, we observe much higher corresponding error rates of ~8-10%, which decrease to ~2-4% when using a consensus genome.

The homozygous error rate (defined for reads that overlap only homozygous variants) is substantially decreased (by ~2-3 fold) when the Reference genome is replaced by the Pan-human consensus. Surprisingly, using the Super-population or Population consensus does not result in further improvement of the mapping accuracy, which indicates that the Pan-human consensus captures the majority of population variation information that can be captured in a linear haploid genome. Using the Super-population or Population consensus genomes may not be worth the loss of generality: for instance, it will severely complicate interpopulation comparisons owing to the lack of a common coordinate system.

These mapping results call into question the time and resources that are being spent on constructing consensus genomes for particular populations [10,19,15,34,39]. Intuitively, one would expect that more specific consensus genomes would increase the mapping accuracy for the populations that they represent. However, our results indicate that a universal Pan-human consensus genome is sufficient to attain the best possible accuracy that can be achieved with a haploid reference, and the expensive efforts to construct more population-specific references are likely futile for improving accuracy of RNA-seq analyses.

On the other hand, the heterozygous error rate (for reads that overlap heterozygous variants) is not significantly reduced by replacing the Reference with a consensus of any population level. This is not surprising given that the haploid genome can only include one of the alleles of a heterozygous locus, and hence cannot truthfully represent it. Graph genomes or other non-linear reference representations will be required to reduce error rates for heterozygous loci.

Although there is still work to be done on improving the Reference genome, the Pan-human consensus already offers noticeable improvements in downstream analyses, such as transcript expression quantification. We demonstrated that there are significantly more transcripts for which the quantification error with respect to the ground truth is higher in the Reference than in the Pan-human consensus. These functional consequences further support our assertion that the Pan-human consensus offers important improvements over the Reference.

The Pan-human consensus appears to be a strict improvement over the current Reference with minimal costs, and thus we propose replacing the current Reference with the Pan-human consensus. Besides the question of absolute utility, we also advocate using consensus genomes as a mechanism to develop practices to improve genome representation more generally. Recent years have seen genomics pipelines using the Reference become entrenched, to varying degrees, by researchers unwilling to upgrade. Because the consensus genome requires very minor changes in pipelines, it can be used as a straightforward, first-order approximation to assess and explore the sensitivity of specific genomic analyses to genome variation. For instance, the benefits of the consensus genome for RNA-seq mapping can be explored via the STAR-consensus pipeline, which aligns reads to the consensus genome and then transforms the coordinates to the Reference genome coordinates, thus eliminating the need for changes in the downstream processing. By incorporating consensus genomes, we envision not only improvements in both the absolute performance of diverse research projects, but also a greater understanding of the dependencies in those methods, thus

setting the stage for a more flexible and robust future for genomics.

## Methods

### Calculating consensus alleles

We calculated the consensus allele for each variant on a per-haplotype basis: the number of occurrences of each allele was counted, and the most common allele was selected. For the Pan-human consensus, the alleles were counted across all individuals. For each Super-population and Population consensus, the alleles were counted across all individuals within that group. This counting was performed in Python by ConsDB, by reading through each VCF file one line at a time and parsing the genotype for each individual in the group for which the consensus is being constructed.

### Genome generation and read mapping

All genomes generation and read mapping was done with STAR v2.7.6a [14]. We used GRCh38 [33] as the reference FASTA file and GENCODE v29 [16] as the reference GTF file. We masked the PAR regions on the Y chromosome in order to avoid any sex-based differences in mapping. For the generation of consensus and personal haploid genomes, we used the `--genomeTransformType Haploid` option and the `--genomeTransformVCF` option with the appropriate VCF file. When mapping, we also used the `--outSAMreadID Number` option in order to more easily keep track of reads in the analysis steps. Other than these options, we used the default STAR parameters.

### Mapping error calculations

Before calculating the mapping error, we made a number of preparations. First, we used awk to construct a VCF file for each individual that contained only the variants and that individual's phased genotype. Next, we used these full VCFs to partition the variants for each consensus genome for each individual into four separate VCF files: one for homozygous SNPs, one for heterozygous SNPs, one for homozygous indels, and one for heterozygous indels. These four split VCFs needed to be generated for each individual, including individuals from within the same population, because variants may be homozygous in one individual but heterozygous in a different individual.

For each individual, their filtered alignments for the Reference, Pan-human consensus, Super-population consensus, and Population consensus were compared to the filtered alignment for their personal haploid genome using an awk script. We compared the genomes on a per-read basis, checking for differences in mapping position and number of mapped loci. To determine what types of variants each read overlapped, we

overlapped the filtered BAM files with each of the four split VCF files using bedtools, for each genome and each individual. We compared the read IDs from this overlap with the read IDs obtained from the genome mapping comparisons using grep, in order to find error-causing variants.

The final steps of read counting and plotting were done using a Python script. For each individual, we summed the read counts for each combination of error type and homozygous/heterozygous variants across all four genomes being analyzed. The two normalization constants used for these figures were the total number of mapped reads for each individual, and the total number of reads for each individual that overlapped personal homozygous variants. The total mapped read numbers were extracted from the STAR Log.final.out file. The counts of reads overlapping personal homozygous variants were found by counting the number of reads present in the previously found overlap files for reads overlapping homozygous variants in the personal haploid genome.

## Finding error-causing variant locations

To find the genomic annotations of error-causing variants, we first found the error-causing variants as described previously. We next used bedtools to intersect these variants with the GENCODE v29 [16] GTF file and find all genomic annotations that each variant overlaps. Because certain genomic annotations always fall within other genomic annotations (e.g. an exon will necessarily be located within a gene), a given variant is likely to have multiple genomic annotations that it overlaps. We used a Python script to determine the most specific genomic annotation overlapped by each variant and to count the number of variants falling within each type of genomic annotation.

## Transcript expression calculations

The genome generation and mapping procedures for the transcript expression calculations were similar to the procedures for the mapping error section, however there were some key differences. The main difference in the genome generation step was the exclusion of insertions and deletions from the Pan-human consensus and HG00512 personal haploid genome. We excluded insertions and deletions for this analysis in order to avoid any discrepancies between the internal transformed genome generated by STAR and the genome used by RSEM to generate its genomic indices. The VCF files used to generate the Pan-human consensus and the HG00512 personal haploid genome were generated by using an awk script to remove insertions and deletions from the VCF files that were used to generate the genomes for the mapping error section. We generated the STAR genomes as previously described, using the SNP-only VCF files. We generated the RSEM genome indices using transformed genome FASTA files, which were

made using bcftools to incorporate the SNPs in the VCF files into the PAR-masked genome.

The mapping steps for this analysis were the same as previously described, with the addition of the `--quantMode GeneCounts TranscriptomeSAM` option to force STAR to export transcriptomic alignments in addition to the standard genomic alignments. We ran RSEM using these STAR-generated transcriptomic alignments as the input.

We used Python scripts to calculate the transcript expression error for each genome, using the TPM values from the RSEM predictions. The log<sub>2</sub> fold change values shown in Figure 4b were plotted without normalization, and the transcripts for which either the Pan-human consensus or the Reference had an estimated TPM of 0 were represented as arrows. Transcripts for which the personal genome had an estimated TPM of 0 were excluded because these transcripts would, by definition, have an infinite log<sub>2</sub> fold change for both the Pan-human consensus and the Reference. Additionally, transcripts for which both the Pan-human consensus and the Reference had an estimated TPM of 0 were excluded in this plot. In Figures 4c-d, all TPM values were normalized by an addition of 0.001 in order to prevent infinite log<sub>2</sub> fold change values.

## Selection of transcript of interest

We selected transcript ALDH3A2-222 through a manual inspection process. We searched for a transcript with significant differential expression between the Reference and the Pan-human consensus, in order to find an example that would highlight the differences in transcript expression calculation between the two genomes. We used DESeq2 to determine statistical significance. However, DESeq2 requires replicates in its inputs, and the HGSV reads only contained one sample. In order to utilize DESeq2 with this data, we randomly split the transcriptomic alignment of each genome into two separate BAM files, ensuring that all alignments for a given read were grouped in the same file. This splitting was performed using a Python script. We then ran RSEM on these split BAM files, and used the `expected_count` column of the RSEM output as the input for DESeq2. Because this column can contain non-integer values, all `expected_count` values were rounded down to the previous integer. For our selection, we only considered transcripts with a DESeq2 adjusted p-value < 0.05. In addition, we also required that the gene to which the transcript belongs was protein coding.

## Code Availability

The ConsDB package is available on GitHub at <https://github.com/kaminow/consdb>. STAR-consensus is available at <https://github.com/alexdobin/star>. Scripts to re-



produce the analysis in this study are available at [https://github.com/kaminow/ConsDB\\_analysis](https://github.com/kaminow/ConsDB_analysis).

## References

- [1] *Assembly Releases and Versions*. (2020, November 12). UCSC Genome Browser. <https://genome.ucsc.edu/FAQ/FAQreleases.html>
- [2] Auton, A., Abecasis, G. R., Altshuler, D. M., Durbin, R. M., Abecasis, G. R., Bentley, D. R., Chakravarti, A., Clark, A. G., Donnelly, P., Eichler, E. E., Flicek, P., Gabriel, S. B., Gibbs, R. A., Green, E. D., Hurler, M. E., Knoppers, B. M., Korbel, J. O., Lander, E. S., Lee, C., ... National Eye Institute, N. (2015). A global reference for human genetic variation. *Nature*, 526(7571), 68–74. <https://doi.org/10.1038/nature15393>
- [3] Balasubramanian, S., Habegger, L., Frankish, A., MacArthur, D. G., Harte, R., Tyler-Smith, C., Harrow, J., & Gerstein, M. (2011). Gene inactivation and its implications for annotation in the era of personal genomics. *Genes & Development*, 25(1), 1–10. <https://doi.org/10.1101/gad.1968411>
- [4] Ballouz, S., Dobin, A., & Gillis, J. A. (2019). Is it time to change the reference genome? *Genome Biology*, 20(1), 159. <https://doi.org/10.1186/s13059-019-1774-4>
- [5] Barbitoff, Y. A., Bezdovnykh, I. V., Polev, D. E., Serebryakova, E. A., Glotov, A. S., Glotov, O. S., & Predeus, A. V. (2018). Catching hidden variation: Systematic correction of reference minor allele annotation in clinical variant calling. *Genetics in Medicine*, 20(3), 360–364. <https://doi.org/10.1038/gim.2017.168>
- [6] Berlin, K., Koren, S., Chin, C.-S., Drake, J. P., Landolin, J. M., & Phillippy, A. M. (2015). Assembling large genomes with single-molecule sequencing and locality-sensitive hashing. *Nature Biotechnology*, 33(6), 623–630. <https://doi.org/10.1038/nbt.3238>
- [7] Buchkovich, M. L., Eklund, K., Duan, Q., Li, Y., Mohlke, K. L., & Furey, T. S. (2015). Removing reference mapping biases using limited or no genotype data identifies allelic differences in protein binding at disease-associated loci. *BMC Medical Genomics*, 8(1), 43. <https://doi.org/10.1186/s12920-015-0117-x>
- [8] Castel, S. E., Levy-Moonshine, A., Mohammadi, P., Banks, E., & Lappalainen, T. (2015). Tools and best practices for data processing in allelic expression analysis. *Genome Biology*, 16(1), 195. <https://doi.org/10.1186/s13059-015-0762-6>
- [9] Chen, R., & Butte, A. J. (2011). The Reference Human Genome Demonstrates High Risk of Type 1 Diabetes and Other Disorders. *Pacific Symposium on Biocomputing. Pacific Symposium on Biocomputing*, 231–242.
- [10] Cho, Y. S., Kim, H., Kim, H.-M., Jho, S., Jun, J., Lee, Y. J., Chae, K. S., Kim, C. G., Kim, S., Eriksson, A., Edwards, J. S., Lee, S., Kim, B. C., Manica, A., Oh, T.-K., Church, G. M., & Bhak, J. (2016). An ethnically relevant consensus Korean reference genome is a step towards personal reference genomes. *Nature Communications*, 7(1), 13637. <https://doi.org/10.1038/ncomms13637>
- [11] Church, D. M., Schneider, V. A., Steinberg, K. M., Schatz, M. C., Quinlan, A. R., Chin, C.-S., Kitts, P. A., Aken, B., Marth, G. T., Hoffman, M. M., Herrero, J., Mendoza, M. L. Z., Durbin, R., & Flicek, P. (2015). Extending reference assembly models. *Genome Biology*, 16(1), 13. <https://doi.org/10.1186/s13059-015-0587-3>
- [12] Clarke, L., Fairley, S., Zheng-Bradley, X., Streeter, I., Perry, E., Lowy, E., Tassé, A.-M., & Flicek, P. (2017). The international Genome sample resource (IGSR): A worldwide collection of genome variation incorporating the 1000 Genomes Project data. *Nucleic Acids Research*, 45(D1), D854–D859. <https://doi.org/10.1093/nar/gkw829>
- [13] Dewey, F. E., Chen, R., Cordero, S. P., Ormond, K. E., Caleshu, C., Karczewski, K. J., Whirl-Carrillo, M., Wheeler, M. T., Dudley, J. T., Byrnes, J. K., Cornejo, O. E., Knowles, J. W., Woon, M., Sangkuhl, K., Gong, L., Thorn, C. F., Hebert, J. M., Capriotti, E., David, S. P., ... Ashley, E. A. (2011). Phased Whole-Genome Genetic Risk in a Family Quartet Using a Major Allele Reference Sequence. *PLoS Genetics*, 7(9), Article 9. <https://doi.org/10.1371/journal.pgen.1002280>
- [14] Dobin, A., Davis, C. A., Schlesinger, F., Drenkow, J., Zaleski, C., Jha, S., Batut, P., Chaisson, M., & Gingeras, T. R. (2013). STAR: Ultrafast universal RNA-seq aligner. *Bioinformatics (Oxford, England)*, 29(1), 15–21. <https://doi.org/10.1093/bioinformatics/bts635>
- [15] Fakhro, K. A., Staudt, M. R., Ramstetter, M. D., Robay, A., Malek, J. A., Badii, R., Al-Marri, A. A.-N., Khalil, C. A., Al-Shakaki, A., Chidiac, O., Stadler, D., Zirrie, M., Jayyousi, A., Salit, J., Mezey, J. G., Crystal, R. G., & Rodriguez-Flores, J. L. (2016). The Qatar genome: A population-specific tool for precision medicine in the Middle East. *Human Genome Variation*, 3(1), 1–7. <https://doi.org/10.1038/hgv.2016.16>
- [16] Frankish, A., Diekhans, M., Ferreira, A.-M., Johnson, R., Jungreis, I., Loveland, J., Mudge, J. M., Sis, C., Wright, J., Armstrong, J., Barnes, I., Berry, A., Bignell, A., Carbonell Sala, S., Chrast, J., Cunningham, F., Di Domenico, T., Donaldson, S., Fiddes, I. T., ... Flicek, P. (2019). GENCODE reference annotation for the human and mouse genomes. *Nucleic Acids Research*, 47(D1), D766–D773. <https://doi.org/10.1093/nar/gky955>
- [17] *Frequently Asked Questions*. (2020, November 12). Genome Reference Consortium. <https://www.ncbi.nlm.nih.gov/grc/help/faq/>
- [18] Garrison, E., Sirén, J., Novak, A. M., Hickey, G., Eizenga, J. M., Dawson, E. T., Jones, W., Garg, S., Markello, C., Lin, M. F., Paten, B., & Durbin, R. (2018). Variation graph toolkit improves read mapping by representing genetic variation in the reference. *Nature Biotechnology*, 36(9), 875–879. <https://doi.org/10.1038/nbt.4227>
- [19] Higasa, K., Miyake, N., Yoshimura, J., Okamura, K., Niihori, T., Saitsu, H., Doi, K., Shimizu, M., Nakabayashi, K., Aoki, Y., Tsurusaki, Y., Morishita, S., Kawaguchi, T.,



- Migita, O., Nakayama, K., Nakashima, M., Mitsui, J., Narahara, M., Hayashi, K., ... Matsuda, F. (2016). Human genetic variation database, a reference database of genetic variations in the Japanese population. *Journal of Human Genetics*, 61(6), 547–553. <https://doi.org/10.1038/jhg.2016.12>
- [20] *Human Genome Overview*. (2020, November 12). Genome Reference Consortium. <https://www.ncbi.nlm.nih.gov/grc/human>
- [21] *Human Genome Project FAQ*. (2020, February 24). National Human Genome Research Institute. <https://www.genome.gov/human-genome-project/Completion-FAQ>
- [22] International Human Genome Sequencing Consortium. (2004). Finishing the euchromatic sequence of the human genome. *Nature*, 431(7011), 931–945. <https://doi.org/10.1038/nature03001>
- [23] Ionita-Laza, I., Lange, C., & Laird, N. M. (2009). Estimating the number of unseen variants in the human genome. *Proceedings of the National Academy of Sciences*, 106(13), 5008–5013. <https://doi.org/10.1073/pnas.0807815106>
- [24] Karczewski, K. J., Francioli, L. C., Tiao, G., Cummings, B. B., Alföldi, J., Wang, Q., Collins, R. L., Laricchia, K. M., Ganna, A., Birnbaum, D. P., Gauthier, L. D., Brand, H., Solomonson, M., Watts, N. A., Rhodes, D., Singer-Berk, M., England, E. M., Seaby, E. G., Kosmicki, J. A., ... MacArthur, D. G. (2020). The mutational constraint spectrum quantified from variation in 141,456 humans. *Nature*, 581(7809), 434–443. <https://doi.org/10.1038/s41586-020-2308-7>
- [25] Karthikeyan, S., Bawa, P. S., & Srinivasan, S. (2016). hg19K: Addressing a significant lacuna in hg19-based variant calling. *Molecular Genetics & Genomic Medicine*, 5(1), 15–20. <https://doi.org/10.1002/mgg3.251>
- [26] Lander, E. S., Linton, L. M., Birren, B., Nusbaum, C., Zody, M. C., Baldwin, J., Devon, K., Dewar, K., Doyle, M., FitzHugh, W., Funke, R., Gage, D., Harris, K., Heaford, A., Howland, J., Kann, L., LeHoczky, J., LeVine, R., McEwan, P., ... The Wellcome Trust: (2001). Initial sequencing and analysis of the human genome. *Nature*, 409(6822), 860–921. <https://doi.org/10.1038/35057062>
- [27] Li, B., & Dewey, C. N. (2011). RSEM: Accurate transcript quantification from RNA-Seq data with or without a reference genome. *BMC Bioinformatics*, 12(1), 323. <https://doi.org/10.1186/1471-2105-12-323>
- [28] Mahmoud, M., Gobet, N., Cruz-Dávalos, D. I., Mounier, N., Dessimoz, C., & Sedlazeck, F. J. (2019). Structural variant calling: The long and the short of it. *Genome Biology*, 20(1), 246. <https://doi.org/10.1186/s13059-019-1828-7>
- [29] Paten, B., Novak, A. M., Eizenga, J. M., & Garrison, E. (2017). Genome graphs and the evolution of genome inference. *Genome Research*, 27(5), 665–676. <https://doi.org/10.1101/gr.214155.116>
- [30] Pritt, J., Chen, N.-C., & Langmead, B. (2018). FORGe: Prioritizing variants for graph genomes. *Genome Biology*, 19(1), 220. <https://doi.org/10.1186/s13059-018-1595-x>
- [31] Rakocevic, G., Semenyuk, V., Lee, W.-P., Spencer, J., Browning, J., Johnson, I. J., Arsenijevic, V., Nadj, J., Ghose, K., Suci, M. C., Ji, S.-G., Demir, G., Li, L., Toptaş, B. Ç., Dolgoborodov, A., Pollex, B., Spulber, I., Glotova, I., Kómar, P., ... Kural, D. (2019). Fast and accurate genomic analyses using genome graphs. *Nature Genetics*, 51(2), 354–362. <https://doi.org/10.1038/s41588-018-0316-4>
- [32] Rosenfeld, J. A., Mason, C. E., & Smith, T. M. (2012). Limitations of the Human Reference Genome for Personalized Genomics. *PLoS ONE*, 7(7), Article 7. <https://doi.org/10.1371/journal.pone.0040294>
- [33] Schneider, V. A., Graves-Lindsay, T., Howe, K., Bouk, N., Chen, H.-C., Kitts, P. A., Murphy, T. D., Pruitt, K. D., Thibaud-Nissen, F., Albracht, D., Fulton, R. S., Kremitzki, M., Magrini, V., Markovic, C., McGrath, S., Steinberg, K. M., Auger, K., Chow, W., Collins, J., ... Church, D. M. (2016). Evaluation of GRCh38 and de novo haploid genome assemblies demonstrates the enduring quality of the reference assembly. *BioRxiv*, 072116. <https://doi.org/10.1101/072116>
- [34] Sherman, R. M., Forman, J., Antonescu, V., Puiu, D., Daya, M., Rafaels, N., Boorgula, M. P., Chavan, S., Vergara, C., Ortega, V. E., Levin, A. M., Eng, C., Yazdanbakhsh, M., Wilson, J. G., Marrugo, J., Lange, L. A., Williams, L. K., Watson, H., Ware, L. B., ... Salzberg, S. L. (2019). Assembly of a pan-genome from deep sequencing of 910 humans of African descent. *Nature Genetics*, 51(1), 30–35. <https://doi.org/10.1038/s41588-018-0273-y>
- [35] Sherry, S. T., Ward, M. H., Kholodov, M., Baker, J., Phan, L., Smigielski, E. M., & Sirotkin, K. (2001). dbSNP: The NCBI database of genetic variation. *Nucleic Acids Research*, 29(1), 308–311. <https://doi.org/10.1093/nar/29.1.308>
- [36] Shukla, H. G., Bawa, P. S., & Srinivasan, S. (2019). hg19KIndel: Ethnicity normalized human reference genome. *BMC Genomics*, 20(1), 459. <https://doi.org/10.1186/s12864-019-5854-3>
- [37] Sirén, J., Monlong, J., Chang, X., Novak, A. M., Eizenga, J. M., Markello, C., Sibbesen, J. A., Hickey, G., Chang, P.-C., Carroll, A., Haussler, D., Garrison, E., & Paten, B. (2020). Genotyping common, large structural variations in 5,202 genomes using pangenomes, the Giraffe mapper, and the vg toolkit. *BioRxiv*, 2020.12.04.412486. <https://doi.org/10.1101/2020.12.04.412486>
- [38] Stevenson, K. R., Coolon, J. D., & Wittkopp, P. J. (2013). Sources of bias in measures of allele-specific expression derived from RNA-seq data aligned to a single reference genome. *BMC Genomics*, 14(1), 536. <https://doi.org/10.1186/1471-2164-14-536>
- [39] Takayama, J., Tadaka, S., Yano, K., Katsuoka, F., Gocho, C., Funayama, T., Makino, S., Okamura, Y., Kikuchi, A., Kawashima, J., Otsuki, A., Yasuda, J., Kure, S., Kinoshita,

- K., Yamamoto, M., & Tamiya, G. (2019). Construction and Integration of Three De Novo Japanese Human Genome Assemblies toward a Population-Specific Reference. *BioRxiv*, 861658. <https://doi.org/10.1101/861658>
- [40] *The Human Genome Structural Variation Consortium*. (n.d.). The International Genome Sample Resource.
- [41] Valenzuela, D., Norri, T., Välimäki, N., Pitkänen, E., & Mäkinen, V. (2018). Towards pan-genome read alignment to improve variation calling. *BMC Genomics*, 19(2), 87. <https://doi.org/10.1186/s12864-018-4465-8>



**Figure 1:** **a)** Construction of a consensus genome; the minor allele in the Reference is replaced by the most common allele in the population.  
**b)** Visual representation of the individuals used to construct consensus genomes of varying population specificity.  
**c)** ConsDB workflow.  
**d)** Number of major alleles for each population consensus genome that were replaced in the Reference.  
**e)** Number of SNPs and indels shared between different combinations of the Pan-human, Super-population, and Population consensus genomes for the African population. The bars in the top bar plot show the number of SNPs and indels that are unique to the intersection of genomes indicated in the dot matrix below. The horizontal bars on the bottom left show the total number of SNPs and indels present in each genome.  
**f)** Number of SNPs and indels shared between different combinations of the Pan-human consensus and all 3 super-population consensus genomes. The bars in the top bar plot show the number of SNPs and indels that are unique to the intersection of genomes indicated in the dot matrix below. The horizontal bars on the bottom left show the total number of SNPs and indels present in each genome.



Figure 2

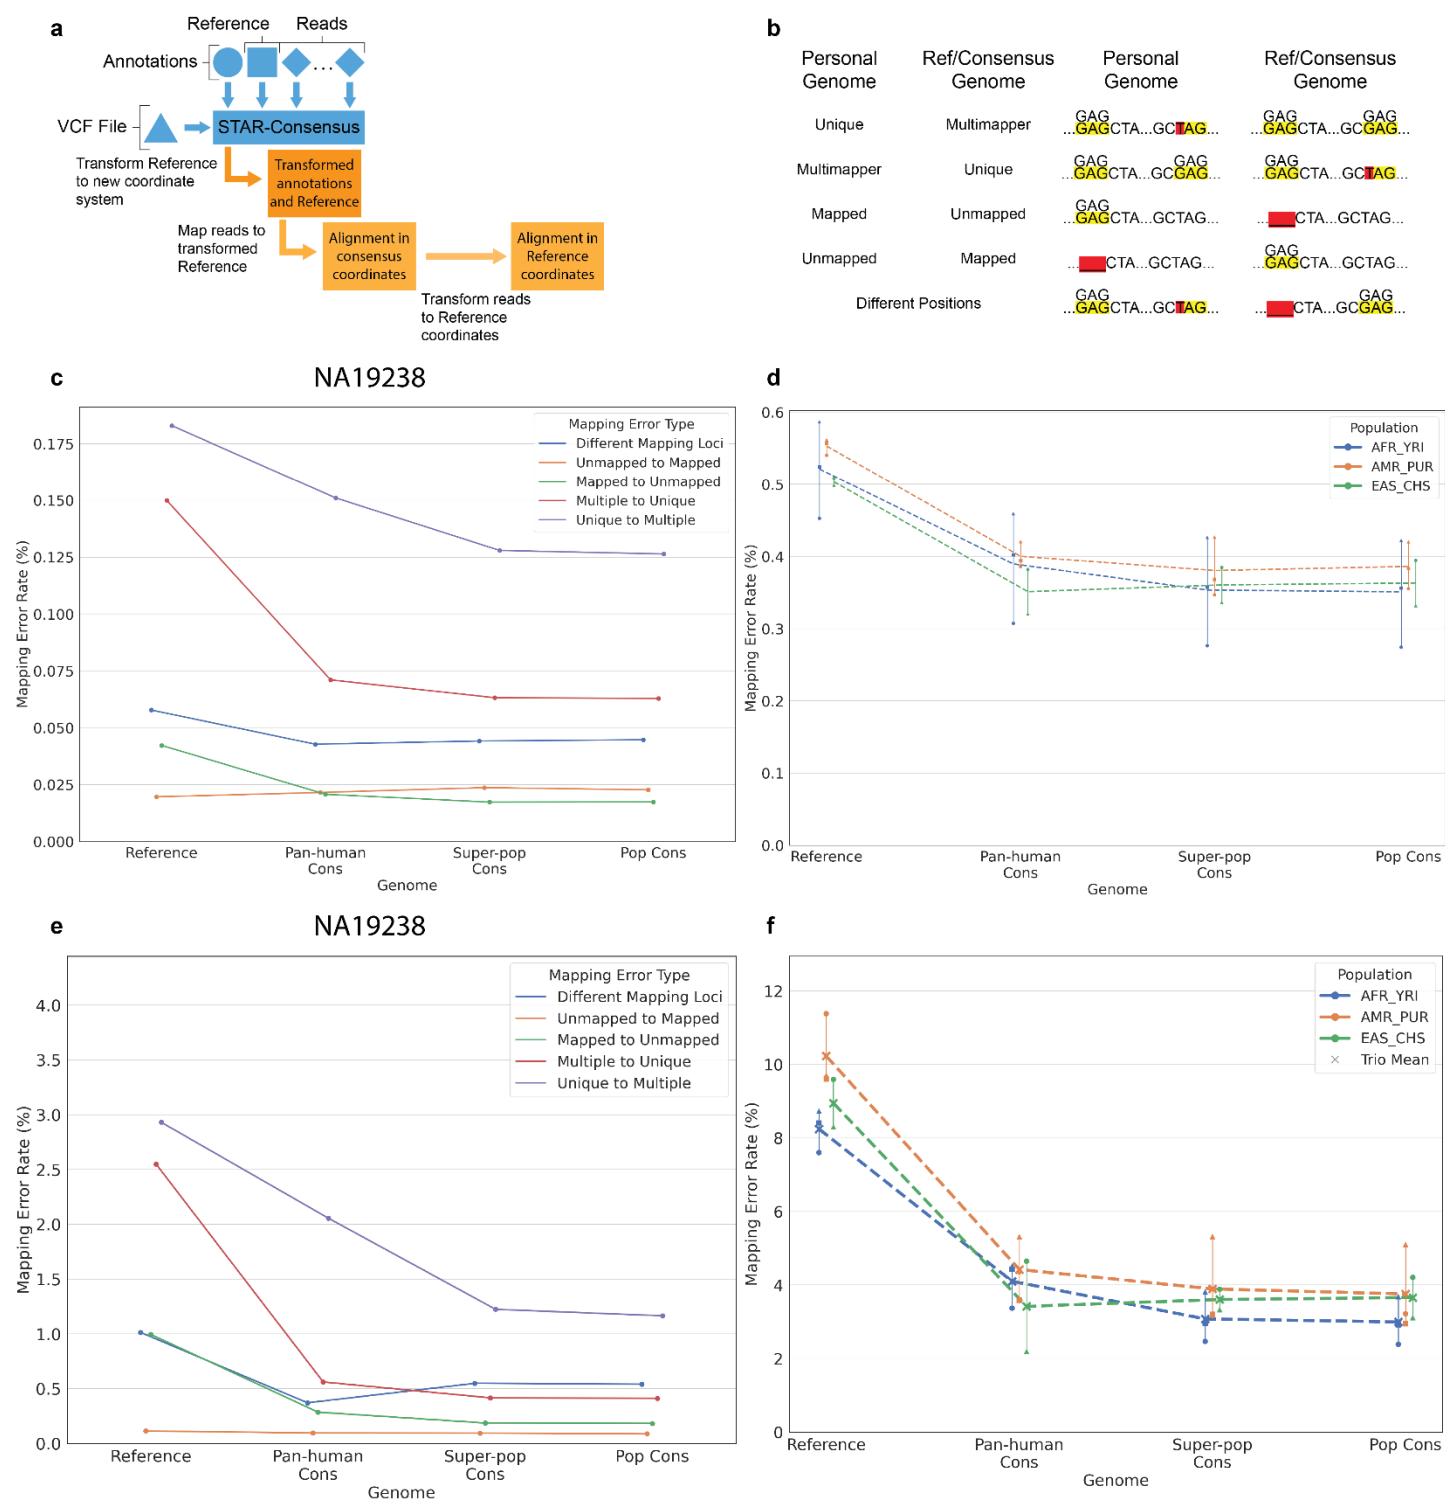

**Figure 2: a)** Internal workflow of STAR-consensus.

**b)** Different types of mapping errors based on the read's mapping status in the individual's haploid personal genome and the Reference or given consensus genome.

**c)** Overall mapping error rate for each error type for individual NA19238. Genome is shown on the x-axis and the mapping error rate is shown on the y-axis.

**d)** Overall mapping error rate for all individuals. Genome is shown on the x-axis and the mapping error rate is shown on the y-axis. Individuals from the same population are grouped together by color, with each marker shape representing one individual in the population. The dashed line shows the average error rate for the population and the solid vertical line shows the range of the population.

**e)** Homozygous mapping error rate for each error type for individual NA19238. Genome is shown on the x-axis and the mapping error rate is shown on the y-axis.

**f)** Homozygous mapping error rate for all individuals. Genome is shown on the x-axis and the mapping error rate is shown on the y-axis. Individuals from the same population are grouped together by color, with each marker shape representing one individual in the population. The dashed line shows the average error rate for the population and the solid vertical line shows the range of the population.

Figure 3

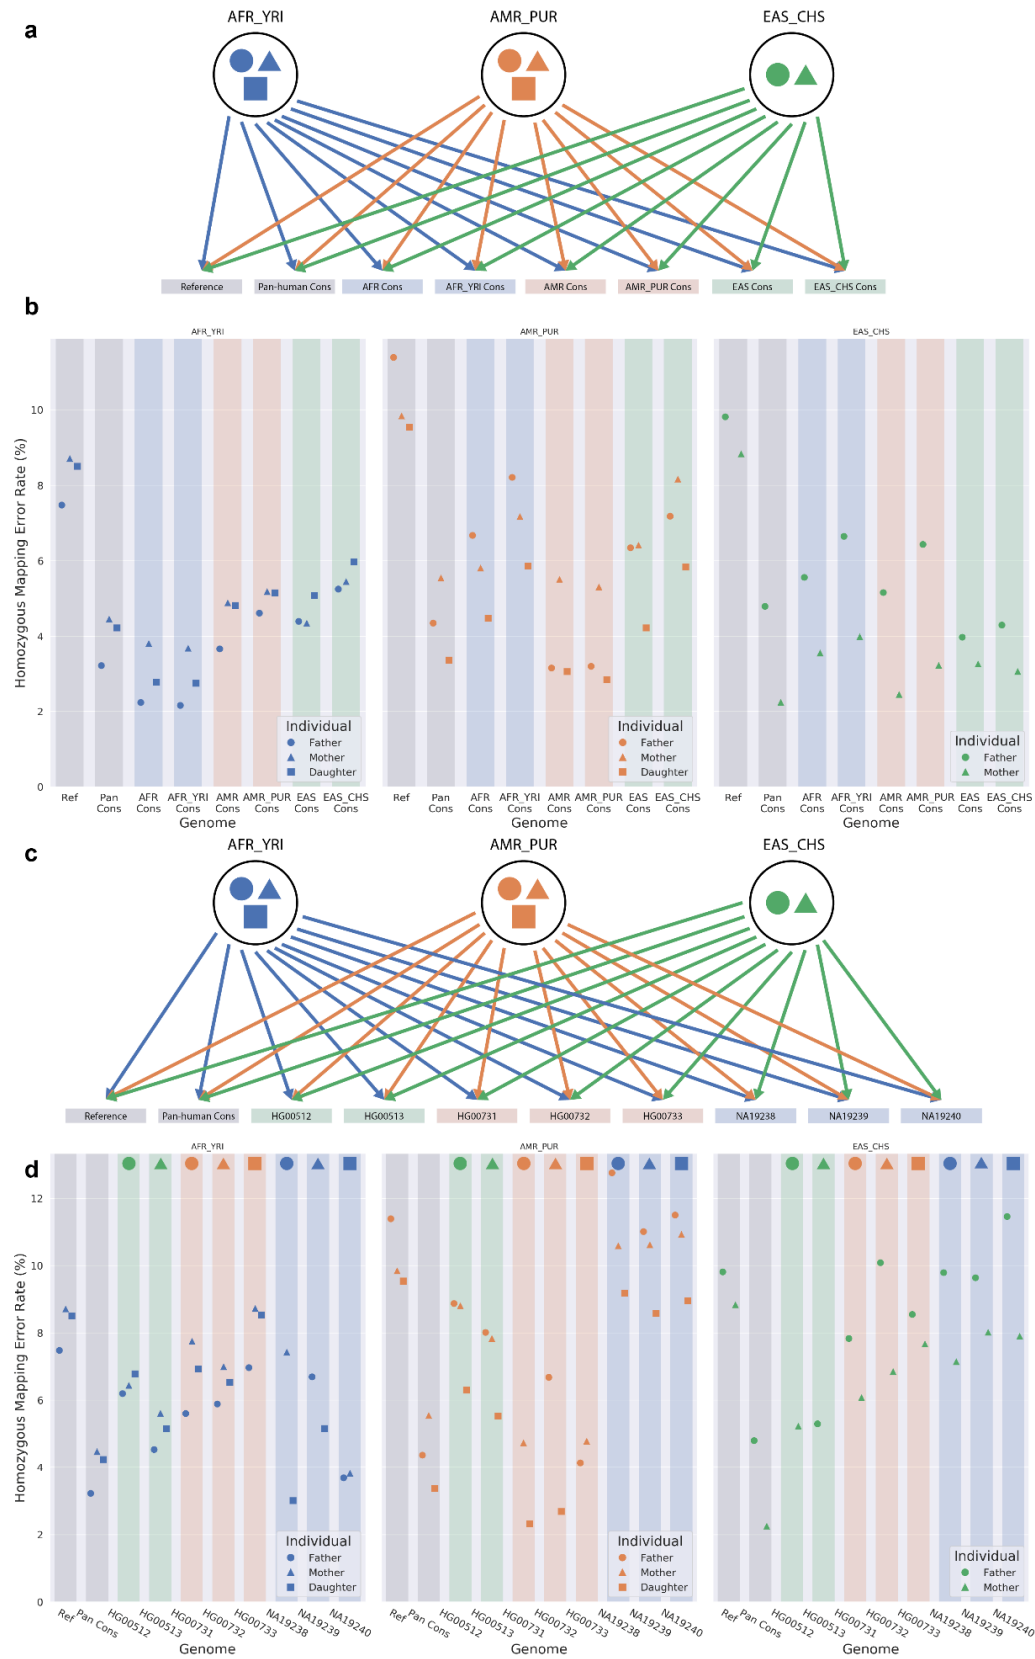

**Figure 3:** **a)** Each individual from each population is independently mapped to the Reference, Pan-human consensus, and all population and super-population consensus genomes.

**b)** Homozygous mapping error rate when mapping to different consensus. The color of the marker indicates the population to which that individual belongs, while the shape of the marker identifies the individual within the trio. The color of the background rectangle indicates the population of the genome.

**c)** Each individual from each population is independently mapped to the Reference, Pan-human consensus, and all personal haploid genomes.

**d)** Homozygous mapping error rate when mapping to different personal haploid genomes. The color of the marker indicates the population to which that individual belongs, while the shape of the marker identifies the individual within the trio. The color of the background rectangle indicates the population of the genome. The shape at the top of each bar indicates to which individual in the trio that genome belongs.



Figure 4

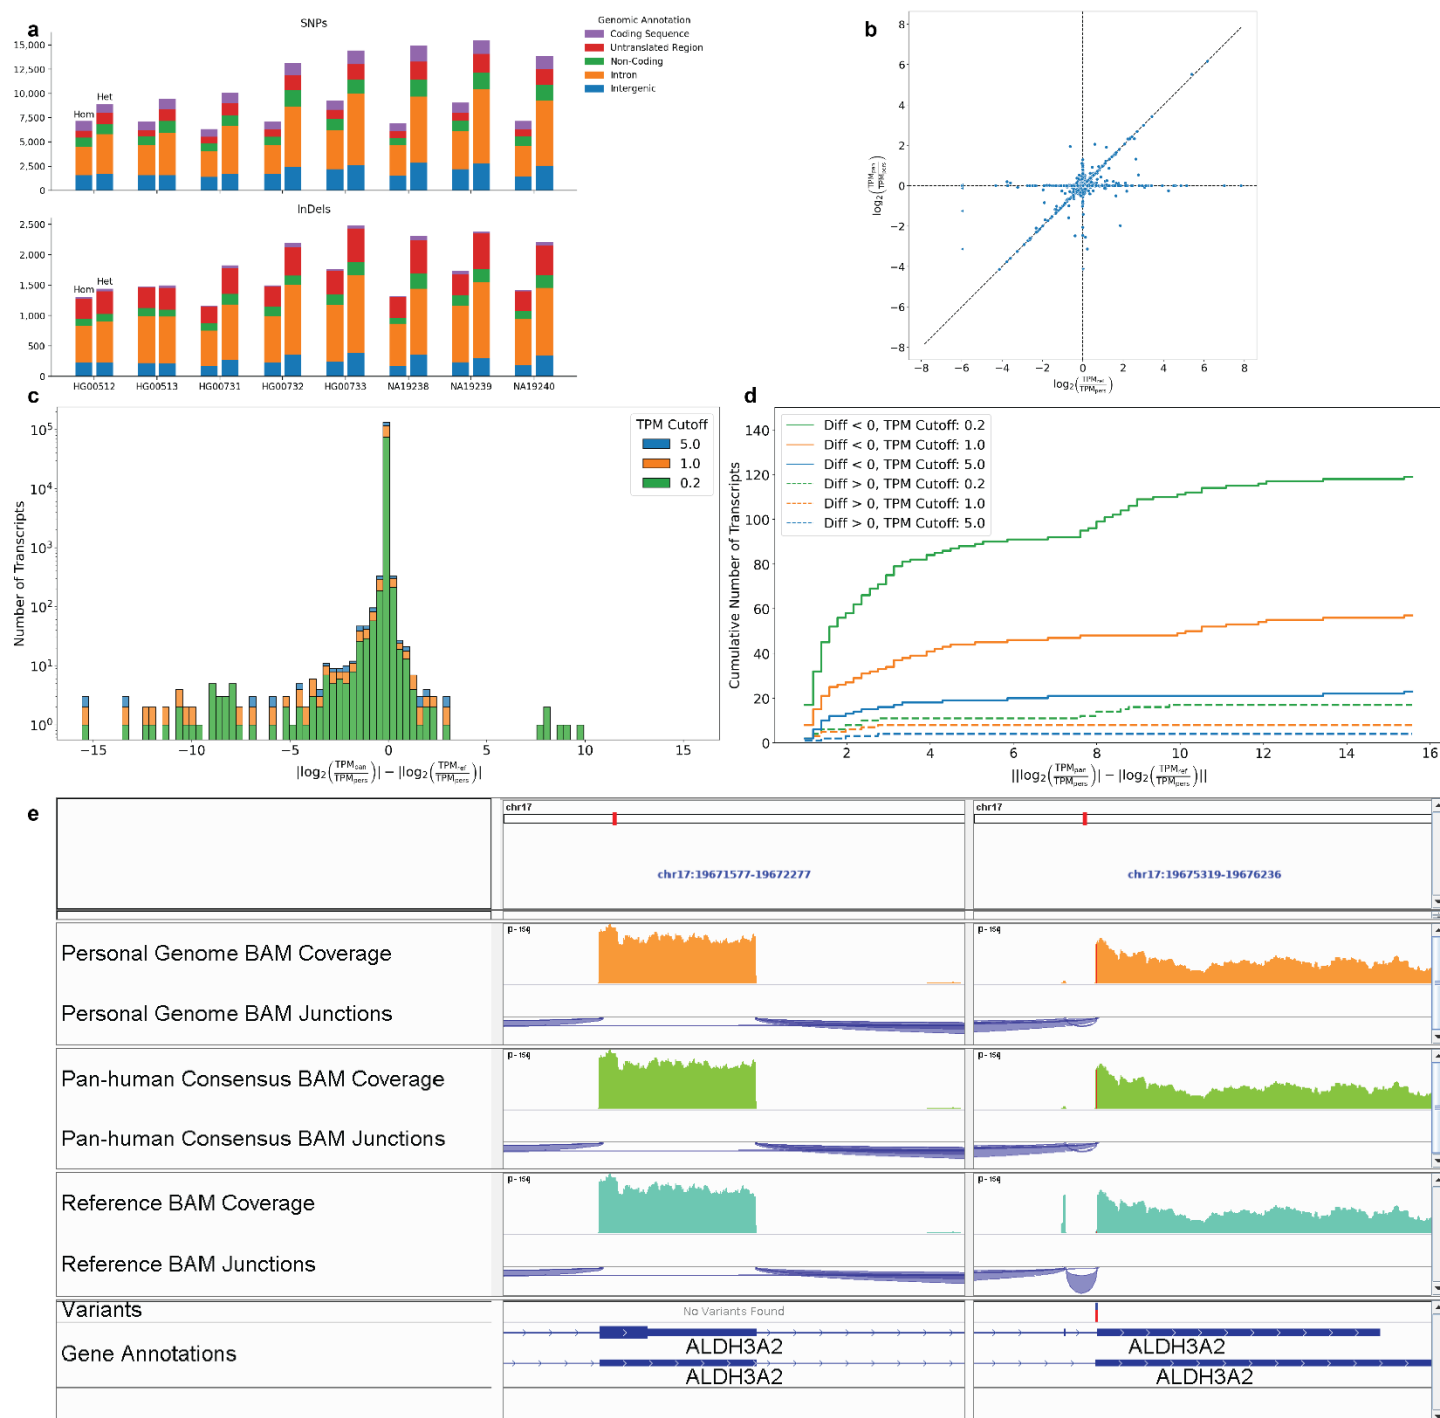

**Figure 4:**

- a)** Counts of variants in the personal haploid genome that cause mapping errors in the Reference, classified by the genomic feature in which the variant is located. For each set of bars, the left bar shows the number of homozygous variants and the right bar shows the number of heterozygous variants.
- b)** Error in transcript quantification in Pan-human vs Reference genome with respect to the Personal genome. Triangles indicate infinite error (i.e. zero expression in one of the genomes).
- c)** Difference between absolute values of Pan-human to Personal and Reference to Personal log-ratios. Different TPM thresholds are represented by different colors.
- d)** Cumulative distribution of the transcript quantification error. Solid lines represent transcripts which have larger quantification errors in the Reference than in the Pan-human genome; dashed lines represent the opposite cases.
- e)** Read coverage and splice junction tracks for HG00512 reads aligned to the Reference, Pan-human consensus, and HG00512 personal genome. The regions shown are part of the ALDH3A2 gene. The Variants track shows the location of one MAR that is present in the Pan-human consensus and the personal genome.
